# Supplementary material for: Research Professors’ Self-assessment of Competencies
Source: Preprints.org preprint supplement (doi:10.20944/preprints202101.0289.v1), 2021-01-15
Supplement: Supplementary file 1 [file supplementary]

We present the final version of the rubric in Spanish.

**Instrucciones**

Contesta todas las preguntas y en cada criterio piensa en las evidencias que podrían demostrar el desempeño solicitado. El último criterio de cada pregunta es el desempeño más alto, es decir, la última opción de cada lista representa el máximo desempeño. Selecciona sólo la opción que represente tu situación, aunque a veces tu respuesta corresponda a un nivel inferior, por no alcanzar o completar todos los elementos del nivel superior. Hay que trabajar esos elementos para llegar a él.

No se espera que tengas el máximo nivel en todas las preguntas. Este es un instrumento aspiracional y con una visión futurista cuyo propósito es apoyar el desarrollo y transformación de los profesores investigadores.

**1. ACTUALIZADO**

El profesor investigador se renueva y evoluciona de forma constante, generando investigación que beneficia a la sociedad, integrando sus aprendizajes de forma rápida en el proceso de transformación de sus estudiantes, en sus actividades profesionales y en las investigaciones y proyectos en los que está involucrado.

**1.1 Transformación de la sociedad**

El profesor investigador realiza investigación que incide en la solución de problemas reales y tangibles con un enfoque global. Utiliza modelos o patrones innovadores de interrelación de investigación básica y aplicada que resulten en investigación de alto impacto para acelerar la transformación de la sociedad. No utiliza métodos de investigación que resulta en investigación que no transciende y sin aplicaciones inmediatas.

1. Participación como miembro de un claustro de posgrado *

Marca solo un óvalo.

a. No pertenezco a un claustro de posgrado

b. En los últimos tres años he participado como miembro activo del claustro de un programa de posgrado

c. En los últimos tres años he dirigido un claustro de posgrado

2. Participación en grupos de investigación interdisciplinaria, en los últimos tres años: *

Marca solo un óvalo.

a. No he participado en un grupo de investigación interdisciplinaria

b. Pertenezco a un Grupo de Investigación de Enfoque Estratégico (GIEE) y colaboro en una Línea de Generación y Aplicación de Conocimiento (LGAC)

c. Mis actividades de investigación están relacionadas con un GIEE e inciden o tienen el impacto para transformar la sociedad

d. He sido líder de un grupo de investigación interdisciplinaria o de un GIEE

e. He participado o he sido líder en uno o varios grupos de investigación interdisciplinaria internacional

3. Publicación de artículos científicos en los últimos tres años: *

Marca solo un óvalo.

a. No he publicado artículos científicos en una revista indizada Q1/Q2

b. He publicado un artículo científico en una revista indizada Q1/Q2, patente otorgada o capítulo en libro con ISBN especializado

c. He publicado de dos a cuatro artículos científicos en revistas indizadas Q1/Q2, patentes otorgadas o capítulo en libro con ISBN especializados

d. He publicado de cinco a nueve artículos científicos en revistas indizadas Q1/Q2, patentes otorgadas o capítulo en libro con ISBN especializados

e. He publicado 10 a 14 artículos en revistas indizadas Q1/Q2, patentes otorgadas o libros completos con ISBN especializados

f. He publicado 15 o más artículos en revistas indizadas Q1/Q2, patentes otorgadas o libros completos con ISBN especializados

4. Citas *

Marca solo un óvalo.

a. Desconozco el número de citas de mis publicaciones

b. Mis publicaciones cuentan con menos de 100 citas

c. Mis publicaciones cuentan con 100 o más citas

d. Mis publicaciones cuentan con 500 o más citas

e. Mis publicaciones cuentan con 1250 o más citas

f. Mis publicaciones cuentan con 2500 o más citas

5. Índice H de: *

Marca solo un óvalo.

a. No conozco mi índice H

b. 1 a 9

c. 10 a 19

d. 20 a 30

e. Más de 31

6. Presentación en congresos en los últimos tres años: *

Marca solo un óvalo.

a. No he presentado ponencias en congresos arbitrados

b. He presentado una ponencia en un congreso nacional o internacional arbitrado de calidad (p.e. SCOPUS y WOS)

c. He presentado de dos a cuatro ponencias en congresos nacionales e internacionales arbitrados de calidad (p.e. SCOPUS y WOS)

d. He presentado cinco o más ponencias en congresos nacionales e internacionales arbitrados de calidad (p.e. SCOPUS y WOS)

e. Además de haber presentado más de cinco ponencias, he participado en un panel de discusión o chair en congresos nacionales e internacionales arbitrados de calidad (p.e. SCOPUS y WOS)

f. Además de las anteriores, he dictado conferencias plenarias por invitación en congresos nacionales e internacionales de calidad (p.e. SCOPUS y WOS)

7. Revisor o Árbitro de ponencias en congresos arbitrados en los últimos tres años: *

Marca solo un óvalo.

a. No he participado como revisor o árbitro de ponencias en congresos arbitrados

b. He participado como revisor o árbitro de una ponencia en un congreso nacional o internacional arbitrado

c. He participado como revisor o árbitro de dos a cuatro ponencias en congresos nacionales o internacionales arbitrados

d. He participado como revisor o árbitro de cinco o más ponencias en congresos nacionales o internacionales arbitrados

e. Además de las anteriores, he sido parte del comité técnico de un congreso arbitrado

8. Organización de congresos arbitrados u otras reuniones académicas *

Marca solo un óvalo.

a. No he participado en la organización de congresos arbitrados u otras reuniones académicas nacionales o internacionales

b. He participado como parte del comité organizador de un congreso arbitrado u otra reunión académica nacional o internacional

c. He participado como parte del comité organizador en dos o más congresos arbitrados u otras reuniones académicas nacionales o internacionales

d. He participado como organizador de uno o más congresos arbitrados u otras reuniones académicas nacionales o internacionales

9. Revisor y evaluador de artículos/Editor en revistas arbitradas en los últimos tres años: *

Marca solo un óvalo.

a. No he participado como revisor o evaluador de revistas arbitradas

b. He participado como evaluador de un artículo en una revista arbitrada

c. He participado como evaluador de dos a cinco artículos en revistas arbitradas

d. He participado como evaluador de seis o más artículos en revistas arbitradas

e. Soy parte del comité editorial en una revista arbitrada

f. Soy el editor de una revista arbitrada

10. Revisor y evaluador de proyectos científicos y programas, en los últimos tres años: *

Marca solo un óvalo

a. No he participado como revisor o evaluador de proyectos científicos o programas

b. He participado como evaluador en un proyecto de investigación

c. He participado como evaluador de dos a cuatro proyectos o programas de posgrado externos

d. He participado como evaluador de cinco o más proyectos o programas de posgrado externos

11. Reconocimientos, en los últimos tres años: *

Marca solo un óvalo.

a. No he recibido ningún reconocimiento por mi investigación

b. Mi investigación es reconocida por la institución o por organismos externos

c. He recibido un premio o reconocimiento a nivel nacional o internacional en mi disciplina

d. He recibido más de dos premios o reconocimientos a nivel nacional o internacional en mi disciplina

e. Además de las anteriores, he representado al Tecnológico de Monterrey en propuestas sobre el desarrollo o mejoría de las políticas del país

12. Liderazgo, en los últimos tres años: *

Marca solo un óvalo.

a. No he participado en algún comité o proyecto institucional a nivel escuela o campus ni he participado en una asociación académica profesional de tu área de especialidad

b. He participado en un comité o proyecto institucional a nivel escuela o campus

c. He participado en un comité o proyecto institucional a nivel escuela o campus y pertenezco a una asociación académica profesional en mi área de especialidad

d. He tenido alguna posición de liderazgo en un comité o asociación

e. He tenido alguna posición de liderazgo institucional o profesional a nivel nacional

f. He tenido alguna posición de liderazgo internacional

**1.2 Formación de Investigadores**

El profesor investigador lleva a cabo el desarrollo de competencias para la investigación a través de la formación y supervisión de otros investigadores, tomando en cuenta reglamentos y delimitaciones institucionales. Realiza un proceso transparente, claro, articulado y documentado. Comparte las buenas prácticas con los investigadores menos expertos y desarrolla talento que genera el cambio y acelera la transformación de la sociedad.

13. Asesoría de tesis, durante toda tu trayectoria: *

Marca solo un óvalo.

a. No he sido asesor de tesis de maestría o doctorado

b. He sido asesor o co-asesor de tesis de uno o más estudiantes de maestría y/o de uno o más estudiantes de doctorado

c. He graduado en tiempo y forma, uno o más estudiantes de maestría y/o de uno a cuatro estudiantes de doctorado como asesor o co-asesor

d. He graduado en tiempo y forma, uno o más estudiantes de maestría y de cinco a 10 estudiantes de doctorado como asesor o co-asesor

e. He graduado en tiempo y forma, uno o más estudiantes de maestría y 11 o más estudiantes de doctorado como asesor o co-asesor

14. Reconocimientos a mis estudiantes, en los últimos tres años: *

Marca solo un óvalo.

a. Mis alumnos no han recibido ningún reconocimiento

b. Mis alumnos han recibido reconocimientos por sus investigaciones

c. Mis alumnos han recibido reconocimientos por sus investigaciones a nivel nacional

d. Mis alumnos han recibido reconocimientos por sus investigaciones a nivel internacional

15. Ingresos de mis estudiantes al SNI, durante mi trayectoria *

Marca solo un óvalo.

a. Ninguno de mis exalumnos tesistas ha ingresado al SNI

b. Uno de mis exalumnos tesistas ha ingresado al SNI

c. Dos o más de mis exalumnos tesistas han ingresado al SNI

16. Co-autoría, en los últimos tres años: *

Marca solo un óvalo.

a. No he publicado artículos en coautoría con mis alumnos

b. He publicado en coautoría con mis alumnos de uno a tres artículos en revistas Q3

c. He publicado en coautoría con mis alumnos cuatro o más artículos en revistas Q3

d. He publicado en coautoría con mis alumnos de uno a seis artículos en revistas Q1/Q2

e. He publicado en coautoría con mis alumnos siete o más artículos en revistas Q1/Q2

17. Ponencias en congresos por mis estudiantes, en los últimos tres años: *

Marca solo un óvalo.

a. Mis estudiantes no han participado en congresos

b. Alguno de mis estudiantes ha presentado un poster en un congreso nacional o internacional arbitrado de calidad (p.e. SCOPUS y WOS)

c. Algunos de mis estudiantes han participado como ponentes, de uno a cuatro congresos nacionales o internacionales arbitrados de calidad (p.e. SCOPUS y WOS)

d. Algunos de mis estudiantes han participado como ponentes, en cinco o más congresos nacionales o internacionales arbitrados de calidad (p.e. SCOPUS y WOS)

18. Desarrollo de otros profesores investigadores, en los últimos tres años: *

Marca solo un óvalo.

a. No he tomado cursos de mentoreo para realizar actividades de apoyo y desarrollo de profesores investigadores

b. He llevado a cabo un entrenamiento formal de mentoreo para realizar actividades de apoyo y desarrollo de profesores investigadores

c. Mentoreo a uno o dos profesores de planta y/o he participado como instructor de cursos de capacitación para desarrollo de profesores investigadores

d. Mentoreo a más de dos profesores de planta y he participado como instructor de cursos y capacitación de desarrollo de profesores investigadores

e. Soy líder de comités institucionales relacionados con el desarrollo y mentoreo de profesores investigadores

2. INNOVADOR

El profesor investigador es capaz de generar e implementar modelos y estrategias innovadoras en sus investigaciones, proyectos de intervención y en el proceso de transformación de sus estudiantes. Genera investigación de alto impacto, modelos, políticas, productos y servicios para la transformación más acelerada de la sociedad.

2.1 Originalidad e Innovación

Es la capacidad del profesor investigador generar, aplicar y transferir el conocimiento de forma original e innovadora para incidir en la solución de situaciones problemáticas que transforman la realidad y generan valor a la sociedad.

19. Propiedad intelectual: derechos de autor y propiedad industrial, en los últimos tres años: *

Marca solo un óvalo.

a. No me he capacitado ni cuento con derechos de autor o patentes

b. Me capacito y conozco la política de propiedad intelectual, registro de patentes, derechos de autor y puedo realizar un registro

c. Cuento con un derecho de autor o una patente ya otorgada resultado de la propiedad intelectual de mis investigaciones

d. He registrado de dos a cinco patentes o derechos de autor, productos o servicios resultado de la propiedad intelectual de mis investigaciones

e. He registrado seis o más patentes o derechos de autor, productos o servicios resultado de la propiedad intelectual de mis investigaciones

20. Generador de conocimiento aplicado, durante toda tu trayectoria: *

Marca solo un óvalo.

a. No he generado conocimiento que haya sido o esté siendo aplicado

b. He generado conocimiento aplicado que produce que una empresa u organización mejore su actividad, servicio, proceso o producto

c. He generado conocimiento aplicado que produce que de dos a cuatro empresas u organizaciones mejoren sus actividades, servicios, procesos o productos

d. He generado conocimiento aplicado que produce que más de cinco empresas u organizaciones mejoren sus actividades, servicios, procesos o productos

21. Transferencia de conocimiento, durante toda tu trayectoria: *

Marca solo un óvalo.

a. No he tenido capacitación para transferir conocimiento

b. Me he entrenado para transferir conocimiento con aspiración a comercializar

c. He generado una licencia de propiedad intelectual vinculada a una empresa, start-up o sistema productivo

d. He generado dos o más licencias, start-up o sistema productivo

e. He recibido regalías por la comercialización de conocimiento que genero

3. INSPIRADOR

El profesor investigador es un formador respetado dentro y fuera de la institución, que desarrolla vínculos con sus estudiantes y les transmite su pasión por la investigación y el descubrimiento, desarrollando en ellos un aprendizaje profundo y significativo. Representa una influencia positiva en el actuar del estudiante más allá de sus interacciones.

3.1 Evaluación docente

El profesor investigador es evaluado por sus alumnos y busca mejorar en cada periodo

22. Evaluación docente a nivel nacional en el ítem REC (Recomendarías a tu profesor), de la ECOA de tu último semestre: *

Marca solo un óvalo.

a. Estoy por debajo del 70% mejor evaluado del total de profesores

b. Estoy dentro del 70% mejor evaluado del total de profesores

c. Estoy dentro del 50% mejor evaluado del total de profesores

d. Estoy dentro del 30% mejor evaluado del total de profesores

23. Evaluación docente a nivel nacional en el indicador de profesor inspirador, de la ECOA de tu último semestre: *

Marca solo un óvalo.

a. Estoy por debajo del 70% mejor evaluado del total de profesores

b. Estoy dentro del 70% mejor evaluado del total de profesores

c. Estoy dentro del 50% mejor evaluado del total de profesores

d. Estoy dentro del 30% mejor evaluado del total de profesores

24. Actividad docente, en los últimos tres años *

Marca solo un óvalo.

a. No he acreditado un mínimo de 40 horas dentro del programa de desarrollo de profesores o cursos que evidencien el desarrollo de características del profesor Tec21

b. He acreditado anualmente un mínimo de 40 horas dentro del Programa de Desarrollo de Profesores en actividades o cursos que evidencia el desarrollo de características del profesor Tec21

c. He participado en las iniciativas del modelo Tec21 de vinculación de alumnos con el ejercicio profesional y en actividades de solución de retos de investigación

d. He diseñado actividades de aprendizaje para la Semana i, Semestre i, proyectos académicos, desarrollo de materiales, recursos de apoyo educativo, evaluación, retos o módulos de aprendizaje de investigación

e. He diseñado e implementado actividades de aprendizaje para la Semana i, Semestre i, proyectos académicos, desarrollo de materiales, recursos de apoyo educativo, evaluación, retos o módulos de aprendizaje de investigación

25. Diseño de estrategias, cursos y programas, en los últimos tres años: *

Marca solo un óvalo.

a. No he diseñado estrategias, cursos, programas o innovación educativa

b. He implementado alguna técnica didáctica en mis cursos (ABP, ABI, entre otros)

c. He participado en el comité de diseño de un curso académico desarrollando los materiales y recursos de apoyo educativo y los sistemas de evaluación

d. He participado en el diseño de algún programa académico incluyendo los planes analíticos-sintéticos, el desarrollo de materiales y recursos de apoyo educativo, así como, los sistemas de evaluación

e. Has sido líder del comité de diseño de algún curso curricular o programa académico incluyendo los planes analíticos y sintéticos, el desarrollo de materiales y recursos de apoyo educativo, así como los sistemas de evaluación

3.2 Ética, Sustentabilidad y Responsabilidad Social

El profesor investigador desarrolla y fortalece el sentido humano para pensar y actuar según los principios de carácter universal y visión institucional que se basan en el valor de la persona, la participación ciudadana y poner el talento personal y profesional al servicio de los demás. Integra el desarrollo de esquemas de solidaridad, respeto a los derechos humanos y a la dignidad de las personas para favorecer los principios de ética y convivencia con otros individuos desarrollando el liderazgo emprendedor y el compromiso social a través de actividades formativas con alto sentido de logro y excelencia académica de sus estudiantes.

26. Ética y ciudadanía para el desarrollo sostenible, en los últimos tres años: *

Marca solo un óvalo.

a. No he tenido capacitación sobre los temas de ética, ciudadanía y desarrollo sostenible

b. Me he capacitado en temas de ética, ciudadanía y desarrollo sostenible

c. He implementado alguna actividad de aprendizaje que desarrolle competencias de apoyo a la visión de formar alumnos con sentido humano

d. He diseñado alguna actividad de aprendizaje para que los alumnos identifiquen oportunidades de transformación social con sentido humano

27. Respecto a mi participación en proyectos comunitarios o vinculados a asociaciones con impacto social:

Marca solo un óvalo.

a. No he participado

b. He participado por lo menos en uno, en los últimos TRES AÑOS.

c. He participado por lo menos en uno, en los últimos CINCO AÑOS

d. Además de las anteriores, has sido líder de un proyecto de mejoramiento con la comunidad o en alguna asociación de impacto social

e. Además de las anteriores, has logrado tener un cargo o rol específico de compromiso social dentro o fuera del Tecnológico de Monterrey

28. Lineamientos de la institución *

Marca solo un óvalo.

a. No conozco los reglamentos de la Institución relacionados con el desarrollo de mis actividades

b. Conozco los reglamentos de la Institución que se vinculan con el desarrollo de mis actividades

c. Además de la anterior, con base a la capacitación y conocimiento de los reglamentos y lineamientos de la Institución me conduzco con respeto y ética con mis colegas y alumnos

d. Además de las anteriores, con base en los lineamientos y reglamentos de la Institución formo alumnos con respeto y ética

4. USO DE TECNOLOGÍA

El profesor utiliza la tecnología como un elemento que habilita y potencia los procesos de transformación de las personas y las organizaciones, así como la generación, aplicación y transferencia del conocimiento.

4.1 Habilidades Meta-Tecnológicas y Uso Innovador de la Tecnología

El profesor investigador utiliza la tecnología como un medio para potenciar el proceso enseñanza aprendizaje. Diseña y aplica experiencias educativas incorporando tecnología para el desarrollo de competencias en el alumno. El profesor investigador promueve en la comunidad académica el uso de la tecnología como apoyo al desarrollo de sus investigaciones. El profesor desarrolla competencias expertas en tecnología para el desarrollo investigación interdisciplinaria.

29. Divulgación y participación en redes científicas y profesionales *

Marca solo un óvalo.

a. No utilizo repositorios institucionales para documentar actividades y evidencias como profesor investigador

b. Utilizo diferentes repositorios para documentar mis actividades y evidencias como profesor investigador

c. Además de la anterior, participo en tres o más redes científicas y/o profesionales para la divulgación y desarrollo de mis investigaciones

d. Además de la anterior, he establecido redes de colaboración internacionales, y soy un medio de enlace en torno a actividades o proyectos interdisciplinarios

e. Además de las anteriores, he sido líder de redes científicas o profesionales

30. Respecto al uso de herramientas tecnológicas como MEDIO DE INTERACCIÓN en mis cursos:

Marca solo un óvalo.

a. No he utilizado herramientas tecnológicas como medio de interacción con los alumnos

b. He utilizado, durante el último año, al menos, una herramienta tecnológica como medio de interacción y colaboración con los alumnos.

c. He utilizado, en los últimos 3 años, al menos, una herramienta tecnológica en, mínimo, el 50% de mis grupos, para llevar a cabo proyectos que involucren colaboración a distancia.

d. He utilizado, en los últimos 3 años, al menos, una herramienta tecnológica en, mínimo, el 75% de mis grupos, para llevar a cabo proyectos que involucren colaboración a distancia.

e. Además de las anteriores, has participado en el diseño e implementación de herramientas tecnológicas que apoyen la operación de uno o más programas académicos en el Tecnológico de Monterrey.

31. Respecto al uso de herramientas tecnológicas como APOYO AL APRENDIZAJE (p. ej.

Blackboard u otra plataforma tecnológica) *

Marca solo un óvalo.

a. No las he utilizado aún.

b. He incorporado, durante el último año, una herramienta tecnológica de apoyo al aprendizaje en AL MENOS UNO de mis grupos

c. He incorporado, durante el último año, una herramienta tecnológica de apoyo al aprendizaje en TODOS mis grupos.

d. He incorporado herramientas tecnológicas de apoyo al aprendizaje ADICIONALES, en al menos 50% de mis cursos.

e. He incorporado herramientas tecnológicas de apoyo al aprendizaje adicionales, en al menos 75% de mis cursos.

f. Además de las anteriores, has participado en el diseño de una o más herramientas tecnológicas que apoyen el aprendizaje de uno o más programas académicos en el Tecnológico de Monterrey

5.VINCULACIÓN

El profesor investigador es un líder de opinión y experto en su entorno profesional, empresarial, académico y social. Realiza investigación interdisciplinaria en redes de colaboración con participación de externos, involucrando a sus estudiantes y atrayendo fondos para financiar los proyectos.

5.1 Desempeño Interdisciplinario y Transdisciplinario

El profesor investigador lidera el grupo con ética, construyendo coaliciones con otros grupos integrando el conocimiento en uno nuevo de forma propositiva para la solución de problemas complejos. Pone el talento personal y profesional al servicio de los demás.

32. Atracción de fondos externos, en los últimos tres años: *

Marca solo un óvalo.

a. No he presentado propuestas para atracción de fondos externos

b. He presentado una o dos propuestas para la atracción de fondos de apoyo para mi investigación

c. He participado o liderado dos o más propuestas que hayan ganado convocatorias o fondos de financiamiento

d. Soy el responsable técnico de dos o más proyectos de investigación fondeados con ingresos externos, y el monto de estos ingresos es mayor al 50% de las metas anuales establecidas para un profesor investigador

e. Soy el responsable técnico de uno o más proyectos de investigación fondeados con ingresos externos, y el monto de estos ingresos es mayor al 60% de las metas anuales establecidas para un profesor investigador

33. Presencia en medios, en los últimos tres años: *

Marca solo un óvalo.

a. No he tenido presencia en medios

b. He difundido mis investigaciones en un programa de radio, prensa o televisión

c. He tenido presencia en medios nacionales tales como programas de radio, prensa, televisión, entrevistas, mesas de diálogo, conferencias magistrales, redes sociales, entre otros

d. He tenido presencia en medios internacionales tales como programas de radio, prensa, televisión, entrevistas, mesas de diálogo, conferencias magistrales, redes sociales, entre otros
